# Supplementary material
Source: Elsevier journal article supplement (https://www.sciencedirect.com/science/article/pii/S141335551830128X)
Supplement: mmc1 [file S141335551830128X:mmc1.docx]

Appendix 1 - Questionnaire

*Participant information and consent form*

This study is developed by the researcher Renato Claudino from the Centro Universitário Estácio de Santa Catarina, Sao Jose, Santa Catarina, Brazil with support from the Brazilian Association of Dermatology Physical Therapy. The study aims to identify the self-reported behavior, knowledge, skills, opinion, and barriers related to the evidence-based practice of Brazilian physical therapists from the dermatology subdiscipline.

Your participation will occur in order to answer a questionnaire that will be presented below, divided into five distinct sections: consent form, demographic details, area from dermatology, skills in reading English texts, characteristics related to evidence-based practice – behavior, knowledge, skills and resources, opinion, and barriers.

It will take around 10 minutes to respond to these questions. Your participation is very important to us! Any questions or clarification can be given by the responsible researchers Tatiane Mota da Silva, email [tati_911@yahoo.com.br](mailto:tati_911@yahoo.com.br), and Renato Claudino, email [renatuss416@hotmail.com](mailto:renatuss416@hotmail.com). It is guaranteed confidentiality of all information collected. The project was previously approved by the Research Ethics Committee of Instituto Brasileiro de Terapias e Ensino (IBRATE), Curitiba, Parana, Brasil (CAAE: 59741316.9.0000.5229). The questionnaire begins after your approval for participation in the study.

*Section 1 – Consent form:*

I declare that I have been informed about the aim of this study and the procedures of my participation. I have received assurance of full confidentiality of information and obtain clarification whenever I want. Thus, I agree to voluntarily participate in this study.

□ I agree to participate in this research study □ I disagree to participate in this research study

*Section 2 – Demographic details:*

Are you currently working as a physical therapist? □ Yes □ No

City/Province:

Number of CREFITO:

Gender: □ Male □ Female

When did you complete your undergraduate degree?

□ Less than 5 years ago

□ 5-9 years ago

□ 10-14 years ago

□ 15-19 years ago

□ 20-24 years ago

What is your highest level of education?

□ Undergraduate degree

□ Postgraduate degree (coursework)

□ Postgraduate degree (master of research)

□ Postgraduate degree (PhD)

□ Post doctorate degree

What is the origin of the University from your undergraduate degree? □ Public □ Private

Are you currently working on:

□ Assisting patients

□ Teaching

□ Researching

What is your main area of interest in dermatology?

□ Plastic Surgery (pre and post)

□ Angiology and lymphedema

□ Dermatology

□ Aesthetic and Cosmetic

□ Burns

What sector you work in? □ Public □ Private □ Both □ Self-employed

Do you have previous experience with teaching? □ Yes □ No

Do you have previous experience with doing research? □ Yes □ No

*Section 3 – English reading skills:*

How do you classify your English reading skills?

□ Bad □ Reasonable □ Good □ Excellent

*Section 4 – characteristics related to EBP – behavior, knowledge, skills and resources, opinion, and barriers:*

What are the resources that you use to get updated information related to your patients' treatments?

□ Courses

□ Congress, conferences, lectures

□ Study groups

□ Books

□ Scientific articles

□ Informal articles (e.g. blogs)

What databases have you ever used?

Pubmed (http://www.ncbi.nlm.nih.gov/pubmed) □ Yes □ No

Cochrane (<http://cochrane.bireme.br/portal/php/index.php>) □ Yes □ No

Scielo (<http://www.scielo.org/php/index.php>) □ Yes □ No

Lilacs (<http://lilacs.bvsalud.org/>) □ Yes □ No

PEDro (http://www.pedro.org.au/) □ Yes □ No

Google scholar (<http://scholar.google.com.br/>) □ Yes □ No

I have never used databases □

What databases do you use most often? (choose up to 3 options)

□ Bireme (http://regional.bvsalud.org/php/index.php)

□ Pubmed (http://www.ncbi.nlm.nih.gov/pubmed)

□ Cochrane (http://cochrane.bireme.br/portal/php/index.php)

□ Scielo (http://www.scielo.org/php/index.php)

□ Lilacs (http://lilacs.bvsalud.org/)

□ PEDro (http://www.pedro.org.au/)

□ Google scholar (http://scholar.google.com.br/)

□ I do not use databases

What is the frequency of the use of this(these) database(s) in the last six months?

□ Every day

□ 1 to 3 times a week

□ 1 to 3 times a month

□ 1 time every 2 months

□ Very rarely

□ I do not use databases

What places do you do the search in the databases?

□ At home

□ Work

□ University

□ I do not use databases

The next questions are statements related to knowledge in Evidence-Based Practice. Please quantify your perceived knowledge.

| Knowledge | Strongly disagree | Partially disagree | Neutral | Partially  agree | Strongly agree |
| --- | --- | --- | --- | --- | --- |
| I know the meaning of the term evidence-based practice. | □ | □ | □ | □ | □ |
| I had no experience with evidence-based practice during my undergraduate or postgraduate course(s). | □ | □ | □ | □ | □ |
| The information about evidence-based practice during my undergraduate or postgraduate degree was sufficient. | □ | □ | □ | □ | □ |
| I do not understand the *core elements* of evidence-based practice. | □ | □ | □ | □ | □ |
| I know clearly how to apply the research findings into clinical practice. | □ | □ | □ | □ | □ |
| I understand different types of studies (study designs). | □ | □ | □ | □ | □ |
| I do not understand statistical data. | □ | □ | □ | □ | □ |
| I believe I have sufficient knowledge to use evidence-based practice. | □ | □ | □ | □ | □ |
| I am not interested in learning more about evidence-based practice. | □ | □ | □ | □ | □ |

The next questions are statements related to skills and resources related to Evidence-Based Practice. Please quantify your perceived skills and resources that you have.

| Skills and resources | Strongly disagree | Partially disagree | Neutral | Partially  agree | Strongly agree |
| --- | --- | --- | --- | --- | --- |
| I am not able to conduct searches in online databases. | □ | □ | □ | □ | □ |
| I am able to critically assess scientific papers. | □ | □ | □ | □ | □ |
| I often access online databases. | □ | □ | □ | □ | □ |
| I am not motivated touseevidence-based practice in my daily practice. | □ | □ | □ | □ | □ |
| I have computer resources and Internet access at my workplace that facilitates the use of evidence-based practice. | □ | □ | □ | □ | □ |
| I do not have discussions about evidence-based practice in my workplace. | □ | □ | □ | □ | □ |
| I ask my patients about their preferences and I consider them in my decision-making. | □ | □ | □ | □ | □ |
| I inform my patients of their treatment options and consider their choices in the decision-making process. | □ | □ | □ | □ | □ |
| I do not use the best scientific evidence in my clinical practice. | □ | □ | □ | □ | □ |

The next questions are statements related to opinion related to Evidence-Based Practice. Please quantify your opinion.

| Opinion | Strongly disagree | Partially disagree | Neutral | Partially  agree | Strongly agree |
| --- | --- | --- | --- | --- | --- |
| Evidence-based practice is important to my clinical practice. | □ | □ | □ | □ | □ |
| I do not believe that evidence-based practice improves patient care in physical therapy. | □ | □ | □ | □ | □ |
| Much of my decision-making regarding the treatment of my patients incorporates evidence-based practice. | □ | □ | □ | □ | □ |
| An expert’s opinion in my field is the most important factor in my decision-making process. | □ | □ | □ | □ | □ |
| The use of the best scientific evidence does not improve the quality of health services. | □ | □ | □ | □ | □ |

The next questions are statements related to barriers related to Evidence-Based Practice. Please quantify how much to you agree with each barrier.

| Barriers | Strongly disagree | Partially disagree | Neutral | Partially  Agree | Strongly Agree |
| --- | --- | --- | --- | --- | --- |
| Language of scientific papers | □ | □ | □ | □ | □ |
| Lack of quality of scientific papers | □ | □ | □ | □ | □ |
| Difficulty to obtain full-text papers | □ | □ | □ | □ | □ |
| Lack of time | □ | □ | □ | □ | □ |
| Difficulty to understand statistics | □ | □ | □ | □ | □ |
| Difficulty to understand the results of the study | □ | □ | □ | □ | □ |
| Difficulty to explain the evidence to the patient | □ | □ | □ | □ | □ |
| Applicability of research findings into clinical practice | □ | □ | □ | □ | □ |
| Lack of evidence-based practice training | □ | □ | □ | □ | □ |
| Lack of knowledge about basics of research | □ | □ | □ | □ | □ |
| Difficulty to critically asses the study quality | □ | □ | □ | □ | □ |
| Lack of interest in research | □ | □ | □ | □ | □ |
| Lack of EBP training | □ | □ | □ | □ | □ |
| Evidence-based practice disregards the patients’ preferences | □ | □ | □ | □ | □ |
| Using evidence-based practice may represent higher cost | □ | □ | □ | □ | □ |
| Unfamiliarity of using online databases | □ | □ | □ | □ | □ |
